# Supplementary material
Source: publisher figshare collection journal article supplement (https://gsapubs.figshare.com/ndownloader/files/34171794)
Supplement: Supplementary file 1 [file 34171794]

## Sheet: Table S9
Supplementary Table S9. Whole-rock Sr and Nd isotope compositions of the leucogranites and phengite gneisses.
Lithology	Sample	Rb (ppm)	Sr (ppm)	87Rb/86Sr	87Sr/86Sr	±2σ	(87Sr/86Sr)i	Sm (ppm)	Nd (ppm)	147Sm/144Nd	143Nd/144Nd	±2σ	εNd(t)	TDM2 (Ma)
Leucogranite	YK173-10a	110.676	195.05	1.64307	0.723051	5.76571e-06	0.717816	3.8999	11.9205	0.198472	0.512023	6.86548e-06	-12.062	1.91858
	YK1711-1a	112.541	249.104	1.30822	0.720959	7e-06	0.716791	4.31099	15.1319	0.172833	0.512005	6.42e-06	-11.6695	1.93077
	YK192-1a	91.8626	255.589	1.04075	0.71945	7.67835e-06	0.716134	4.8434	20.206	0.145416	0.511923	3.45206e-06	-12.4879	2.00696
Phengite gneiss	YK173-10b	81.3892	496.832	0.474358	0.714384	6.58685e-06	0.712872	4.18803	20.9384	0.121342	0.511819	1.31547e-05	-13.831	2.11977
	YK1711-1b	103	339	0.879805	0.716602	7e-06	0.713799	4.56	25.5	0.108484	0.51178	5.03e-06	-14.2192	2.15284
	YK192-1b	120.807	270.829	1.29165	0.716083	8.43436e-06	0.711968	3.2621	18.5587	0.106633	0.511761	5.62964e-06	-14.5401	2.179
(87Sr/86Sr)i, and εNd(t) were calculated with the timing of metamorphism at c. 224 Ma;
87Rb/86Sr and 144Sm/147Nd ratios were calculated using Rb, Sr and Sm, Nd contents, respectively, measured by ICP-MS; εNd(t) (the part per 10,000 deviation of a 143Nd/144Nd ratio from the chondritic ratio at any time) values were calculated based on present-day (147Sm/144Nd)CHUR=0.1967; (143Nd/144Nd)CHUR = 0.512638; TDM2 values were calculated with present-day (147Sm/144Nd)DM=0.2137, and (143Nd/14…
